# Supplementary material for: Exosomal levels of miRNA-21 from cerebrospinal fluids associated with poor prognosis and tumor recurrence of glioma patients
Source: PubMed Central journal article supplement (PMC4694967; doi:10.18632/oncotarget.4699), 2015-08-10
Supplement: oncotarget-06-26971-s001.pdf [file oncotarget-06-26971-s001.pdf]

SUPPLEMENTARY FIGURES AND TABLES

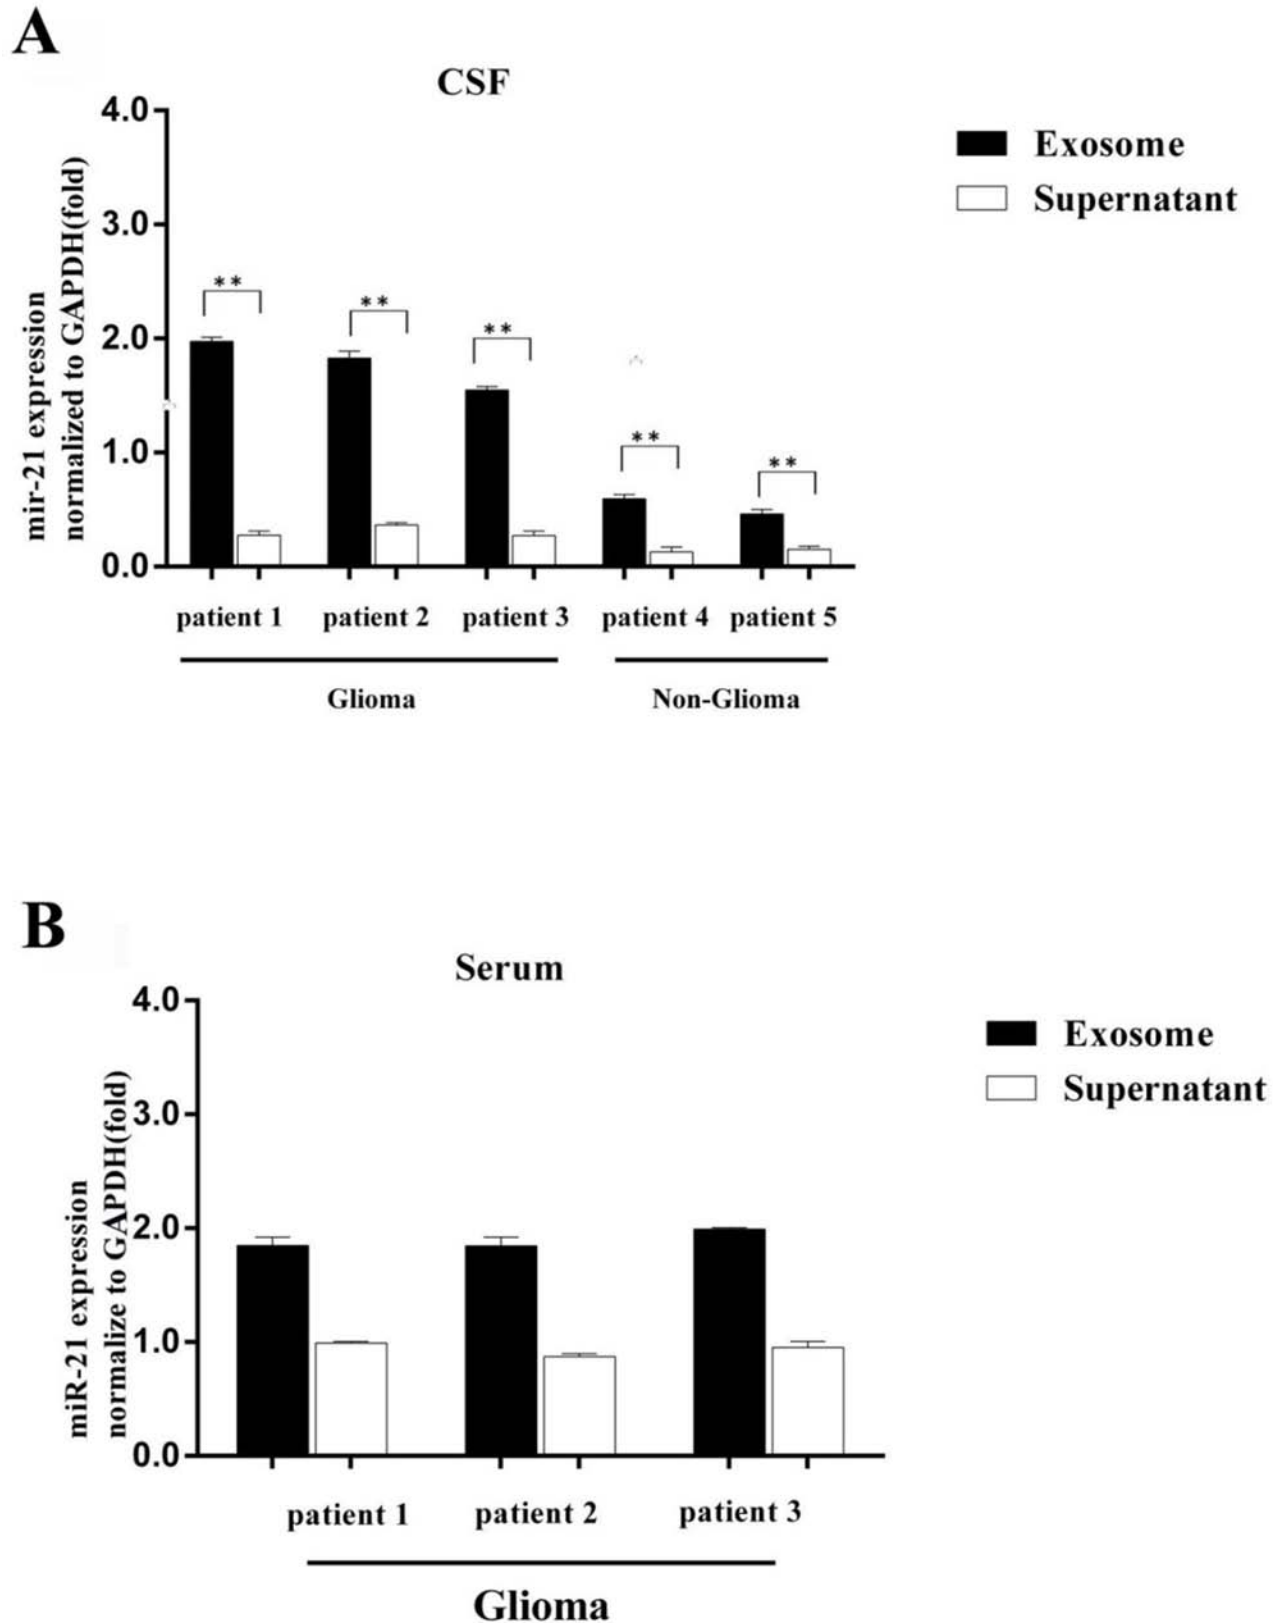

Supplementary Figure S1: miR-21 expression levels. A. miR-21 levels in CSF of glioma or non-glioma control patients. B. miR-21 levels in serum of the glioma patients. \*\* $p < 0.01$ .

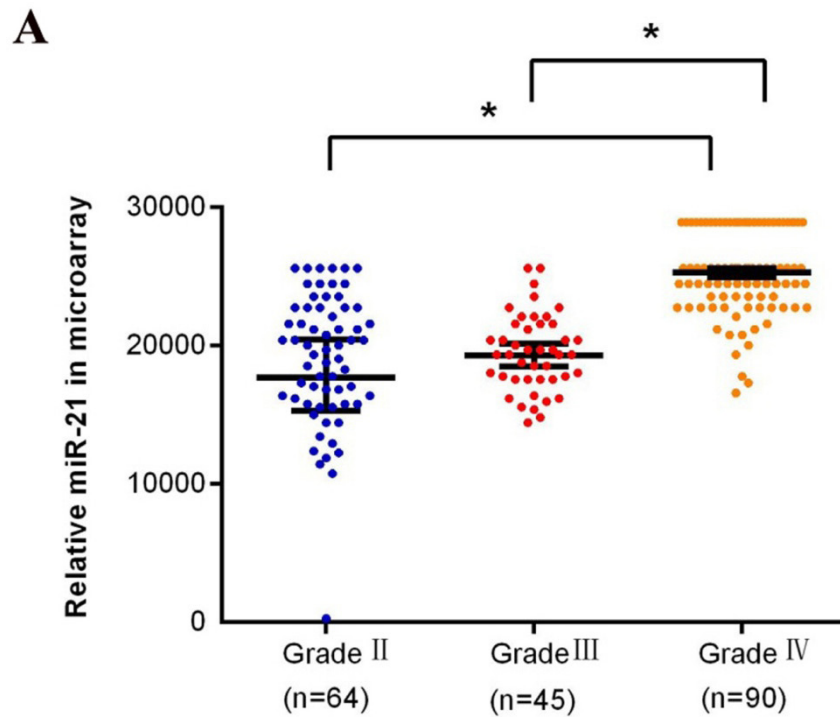

**Supplementary Figure S2: Microarray analysis of miR-21 in glioma patients of different glioma grades.** Relative miR-21 expression in brain tissues of 198 glioma patients with pathological grades of II–IV.

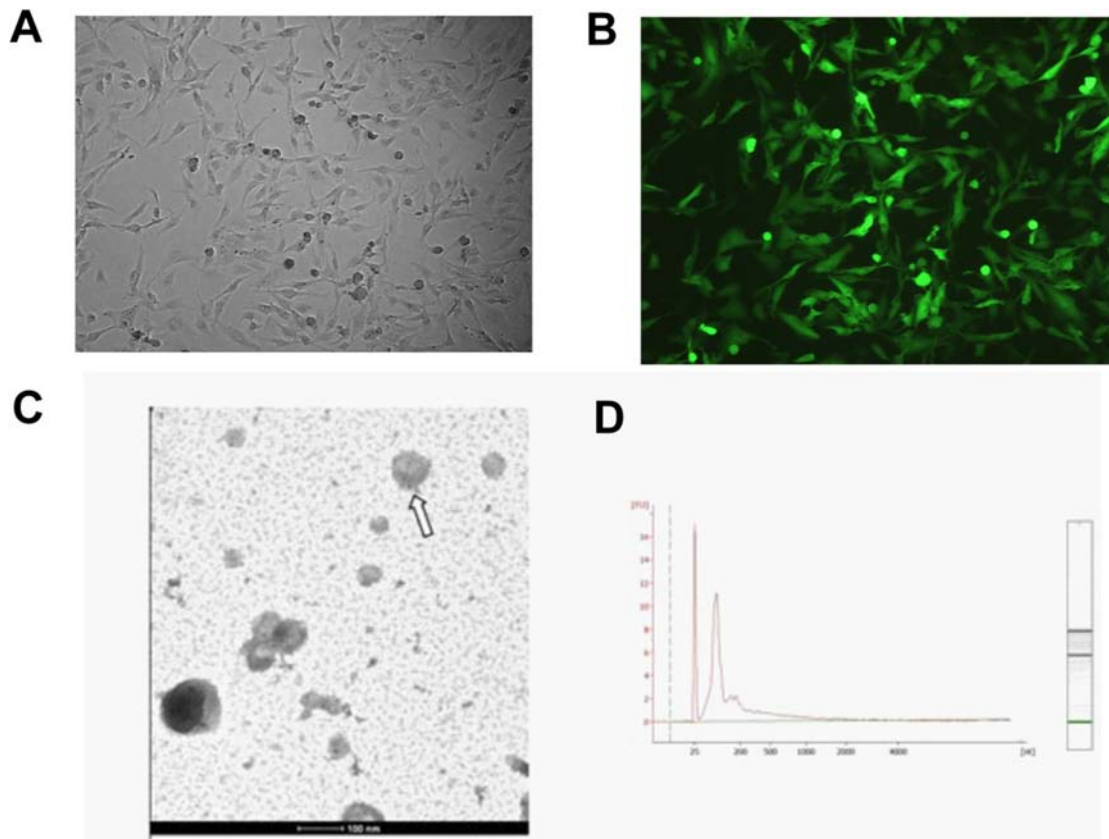

**Supplementary Figure S3: Lentiviral infection of GFP construct into U251 cells. A.** U251 cells under bright field of the microscope. **B.** U251 cells infected by Lentiviral-GFP with Roche Fugene HD for 48 h. **C.** TEM images of exosomes derived from the supernatant of U251 medium for identification of exosomes. **D.** Quality analysis of exosomal RNA of the cell determined by an Agilent Bioanalyzer.

**Supplementary Table S1. Clinical features of patients with glioma or non-glioma controls**

|                                      | % of patients |              | <i>P</i>            |
|--------------------------------------|---------------|--------------|---------------------|
|                                      | Control Group | Glioma Group |                     |
| Total number                         | 25            | 70           |                     |
| Men                                  | 18 (72)       | 42 (60)      |                     |
| Women                                | 7 (28)        | 28 (40)      | <b><i>0.944</i></b> |
| Age: Median±SD                       | 54.3 ± 16.9   | 49.8 ± 13.5  | <b><i>0.452</i></b> |
| Reasons for admission                |               |              |                     |
| Cerebral hemorrhage                  | 3 (12)        |              |                     |
| Hydrocephalus                        | 1 (4)         |              |                     |
| Severe head trauma                   | 10 (40)       |              |                     |
| Subarachnoid hemorrhage              | 7 (28)        |              |                     |
| Pituitary adenomas                   | 2 (8)         |              |                     |
| Lymphocyte infiltration hypophysitis | 2 (8)         |              |                     |

Abbreviations: SD, standard deviation; *P* < .05.

**Supplementary Table S2. Correlation of miR-21 expression level with other clinical pathological features in 198 glioma patients**

| Clinicopathological features | No. of cases | miR-21 expression   |                      | <i>P</i> |
|------------------------------|--------------|---------------------|----------------------|----------|
|                              |              | Low ( <i>n</i> , %) | High ( <i>n</i> , %) |          |
| <b>WHO grade</b>             |              |                     |                      | <0.001   |
| <b>II</b>                    | 64           | 47 (73%)            | 17 (17%)             |          |
| <b>III</b>                   | 45           | 38 (84%)            | 7 (16%)              |          |
| <b>IV</b>                    | 90           | 13 (14%)            | 77 (86%)             |          |
| <b>Sex</b>                   |              |                     |                      | 0.23     |
| <b>Male</b>                  | 133          | 58 (43%)            | 75 (57%)             |          |
| <b>Female</b>                | 65           | 40 (61%)            | 25 (39%)             |          |
| <b>Age</b>                   |              |                     |                      | <0.001   |
| <b>&lt;50</b>                | 48           | 23 (47%)            | 27 (53%)             |          |
| <b>&gt;50</b>                | 150          | 25 (16%)            | 125 (84%)            |          |
| <b>KPS</b>                   |              |                     |                      | 0.373    |
| <b>&gt;70</b>                | 70           | 38 (54%)            | 32 (46%)             |          |
| <b>&lt;70</b>                | 128          | 60 (46%)            | 68 (54%)             |          |

**Supplementary Table S3: Cox multivariate analysis**

| Parameter              | Risk  | 95% confidence interval | <i>P</i> |
|------------------------|-------|-------------------------|----------|
| Age                    | 1.200 | 0.634–1.212             | 1.232    |
| Sex                    | 1.227 | 0.810–1.857             | 1.227    |
| KPS                    | 0.850 | 0.572–1.264             | 0.850    |
| WHO grade              | 3.543 | 2.637–4.760             | 0.000    |
| miR-21 xpression level | 1.634 | 1.083–2.467             | 0.019    |
